# Supplementary material for: Baseline Longitudinal Strain Predicts Recovery of Left Ventricular Ejection Fraction in Hospitalized Patients With Nonischemic Cardiomyopathy
Source: PubMed Central journal article supplement — J Am Heart Assoc. 2018 Oct 11;7(20):e09841. doi: 10.1161/JAHA.118.009841 (PMC6474980; doi:10.1161/jaha.118.009841), 2018-10-11

# **Supplemental Material**

**Table S1. Clinical characteristics of NICM cohort by among included and excluded participants.**

| <b>Characteristics</b>                            | <b># of patients</b> | <b>Included<br/>(n = 166)</b> | <b>Excluded<br/>(n = 427)</b> | <b>P-value</b> |
|---------------------------------------------------|----------------------|-------------------------------|-------------------------------|----------------|
| Age, mean $\pm$ SD, years                         | 582                  | 54 $\pm$ 16                   | 58 $\pm$ 15                   | 0.01           |
| Female, n (%)                                     | 582                  | 87 (52)                       | 152 (37)                      | <.01           |
| Body mass index, mean $\pm$ SD, kg/m <sup>2</sup> | 518                  | 29.5 $\pm$ 8.1                | 31.5 $\pm$ 9.6                | 0.02           |
| Systolic Blood Pressure, mean $\pm$ SD, mmHg      | 502                  | 137.2 $\pm$ 30.6              | 135.8 $\pm$ 30.2              | 0.62           |
| Diastolic Blood Pressure, mean $\pm$ SD, mmHg     | 502                  | 86.0 $\pm$ 20.0               | 83.7 $\pm$ 19.4               | 0.22           |
| Heart Rate, median (IQR), beats/min               | 509                  | 98 (85-113)                   | 95 (82-111)                   | 0.07           |
| Race                                              | 581                  |                               |                               | 0.40           |
| Black, n (%)                                      |                      | 93 (56)                       | 211 (51)                      |                |
| Other, n (%)                                      |                      | 13 (8)                        | 45 (11)                       |                |
| White, n (%)                                      |                      | 60 (36)                       | 159 (38)                      |                |
| Medications                                       |                      |                               |                               |                |
| ACE/ARB, n (%)                                    | 583                  | 102 (61)                      | 221 (53)                      | 0.06           |
| Aspirin, n (%)                                    | 583                  | 55 (33)                       | 135 (32)                      | 0.86           |
| Beta blocker, n (%)                               | 583                  | 105 (63)                      | 233 (56)                      | 0.10           |
| Loop Diuretic, n (%)                              | 583                  | 81 (49)                       | 192 (46)                      | 0.55           |
| MRA, n (%)                                        | 583                  | 32 (19)                       | 63 (15)                       | 0.22           |
| Comorbidities                                     |                      |                               |                               |                |
| Atrial Fibrillation, n (%)                        | 543                  | 63 (38)                       | 147 (39)                      | 0.82           |
| CKD, n (%)                                        | 543                  | 62 (37)                       | 113 (30)                      | 0.09           |
| Hypertension, n (%)                               | 543                  | 137 (83)                      | 329 (87)                      | 0.14           |
| Diabetes, n (%)                                   | 543                  | 46 (28)                       | 160 (42)                      | <.01           |
| COPD, n (%)                                       | 543                  | 53 (32)                       | 105 (28)                      | 0.34           |
| Laboratory                                        |                      |                               |                               |                |
| Hemoglobin, mean $\pm$ SD, g/dl                   | 551                  | 12.5 $\pm$ 2.4                | 12.9 $\pm$ 2.3                | 0.09           |
| Sodium, mean $\pm$ SD, mEq/L                      | 553                  | 137.7 $\pm$ 3.2               | 137.6 $\pm$ 3.9               | 0.82           |
| Creatinine, median (IQR), mg/dl                   | 553                  | 1.1 (0.9-1.4)                 | 1.2 (0.9-1.6)                 | 0.08           |
| eGFR, median (IQR), mL/min/1.73 m <sup>2</sup>    | 551                  | 68.7 (46.9-84.7)              | 63.8 (45.8-82.8)              | 0.27           |

|                                                             |     |                  |                  |      |
|-------------------------------------------------------------|-----|------------------|------------------|------|
| Troponin, median (IQR), ng/mL                               | 472 | 0.04 (0.02-0.09) | 0.05 (0.03-0.11) | 0.05 |
| BNP, median (IQR), pg/mL                                    | 370 | 909 (395-1491)   | 868 (409-1635)   | 0.82 |
| QRS duration, median (IQR), ms                              | 564 | 92 (84-109)      | 98 (86-118)      | 0.01 |
| <i>Baseline Cardiac Structure, Function and Mechanics</i>   |     |                  |                  |      |
| LVEF, mean $\pm$ SD, %                                      | 582 | 25.2 $\pm$ 7.8   | 23.9 $\pm$ 7.9   | 0.07 |
| Longitudinal strain, mean $\pm$ SD                          | 237 | 7.7 $\pm$ 3.1    | 7.6 $\pm$ 3.1    | 0.80 |
| Circumferential strain, mean $\pm$ SD                       | 218 | 12.1 $\pm$ 4.8   | 10.9 $\pm$ 4.8   | 0.10 |
| Radial strain, median (IQR)                                 | 188 | 5.0 (3.0-8.0)    | 6.0 (4.0-8.0)    | 0.32 |
| MSP, mean $\pm$ SD                                          | 180 | 8.5 $\pm$ 2.9    | 8.8 $\pm$ 2.4    | 0.68 |
| LVEDD, mean $\pm$ SD, cm                                    | 266 | 5.4 $\pm$ 1.0    | 5.7 $\pm$ 1.1    | 0.02 |
| LVESD, mean $\pm$ SD, cm                                    | 266 | 4.4 $\pm$ 1.2    | 4.7 $\pm$ 1.2    | 0.09 |
| <i>Follow-Up Cardiac Structure, Function, and Mechanics</i> |     |                  |                  |      |
| LVEF, mean $\pm$ SD, %                                      | 275 | 35.3 $\pm$ 14.3  | 33.1 $\pm$ 14.9  | 0.22 |
| Longitudinal strain, mean $\pm$ SD,                         | 239 | 10.7 $\pm$ 4.5   | 10.6 $\pm$ 4.3   | 0.94 |
| Circumferential strain, mean $\pm$ SD                       | 227 | 18.2 $\pm$ 6.8   | 17.0 $\pm$ 7.8   | 0.21 |
| Radial strain, median (IQR)                                 | 219 | 7.0 (4.0-12.0)   | 9.0 (4.0-13.0)   | 0.10 |
| MSP, mean $\pm$ SD                                          | 214 | 12.5 $\pm$ 4.7   | 12.6 $\pm$ 5.1   | 0.84 |

Values are mean (range), median (interquartile range), or n (%)

NICM= Non-ischemic cardiomyopathy; ACE/ARB = Angiotensin-converting enzyme inhibitor/Angiotensin II receptor blocker; CAD = coronary artery disease; CKD = chronic kidney disease; COPD = chronic obstructive pulmonary disease; eGFR = estimated glomerular filtration rate; BNP = brain natriuretic peptide; HFrEF = Heart failure with reduced ejection fraction; HTN = Hypertension; LVEDD = left ventricular end-diastolic dimension; LVEF = left ventricular ejection fraction; LVESD = left ventricular end systolic dimension; MRA = mineralocorticoid receptor antagonist; MSP = myocardial systolic performance; PAD = peripheral arterial disease

**Table S2. Association of Follow-up Echocardiogram Strain Values with Hospitalization for Heart Failure, Death and Composite Outcome Among 166 Patients, Unadjusted and Adjusted for Age, Sex, Race and Recovery Status.**

| Variable | N   | Hospitalization |               |         |                     | Death         |               |         |                     | Composite Outcome |                |         |                     |
|----------|-----|-----------------|---------------|---------|---------------------|---------------|---------------|---------|---------------------|-------------------|----------------|---------|---------------------|
|          |     | No<br>(n=73)    | Yes<br>(n=93) | P-value | Adjusted<br>P-value | No<br>(n=123) | Yes<br>(n=43) | P-value | Adjusted<br>P-value | No<br>(n=57)      | Yes<br>(n=109) | P-value | Adjusted<br>P-value |
| LS       | 146 | 11.5 ± 4.9      | 10.0 ± 4.0    | 0.05    | 0.05                | 11.3 ± 4.5    | 8.6 ± 3.8     | <0.01   | 0.08                | 12.3 ± 4.7        | 9.7 ± 4.2      | <0.01   | 0.01                |
| CS       | 141 | 19.1 ± 6.7      | 17.5 ± 7.0    | 0.19    | 0.23                | 18.9 ± 6.7    | 16.2 ± 7.0    | 0.05    | 0.64                | 20.1 ± 6.8        | 17.2 ± 6.7     | 0.02    | 0.06                |
|          |     | 7.0             | 7.0           |         |                     | 7.0           | 6.0           |         |                     | 7.0               | 6.5            |         |                     |
| RS       | 139 | (4.0-12.0)      | (4.0-11.0)    | 0.98    | 0.71                | (4.0-12.0)    | (2.5-10.5)    | 0.19    | 0.34                | (4.0-12.0)        | (4.0-11.5)     | 0.60    | 0.78                |
| MSP      | 136 | 13.0 ± 4.6      | 12.0 ± 4.9    | 0.25    | 0.28                | 13.0 ± 4.7    | 10.4 ± 4.3    | 0.01    | 0.20                | 13.6 ± 4.4        | 11.8 ± 4.8     | 0.03    | 0.12                |

LS = longitudinal strain; CS = circumferential strain; RS = radial strain; MSP = myocardial systolic performance

\*Mean±SD or Median (IQR) reported as appropriate

Figure S1. ROC of Varied GLS Cutpoints as a Predictor of Recovery.

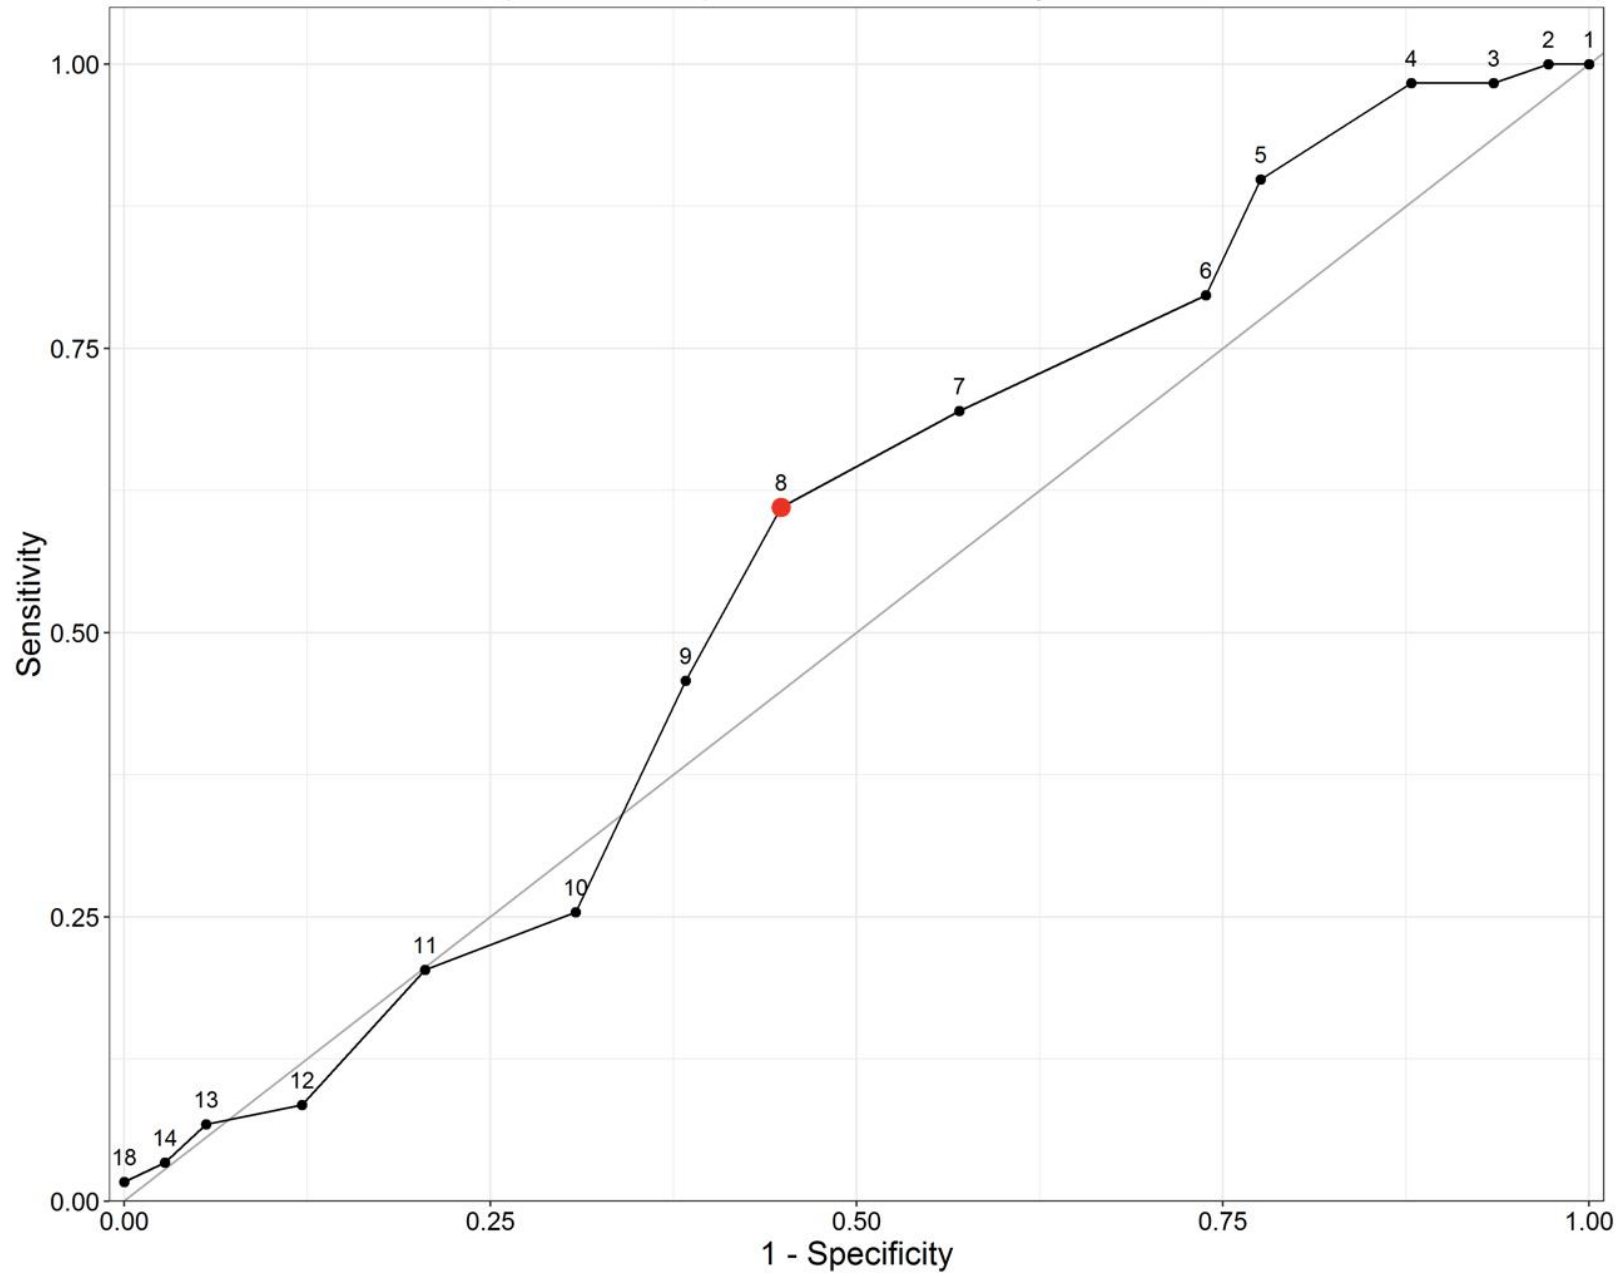

Supplement: JAH3-7-0e09841-s001.pdf [file JAH3-7-0e09841-s001.pdf]
